# Supplementary material for: Amyloid peptides ABri and ADan show differential neurotoxicity in transgenic Drosophila models of familial British and Danish dementia
Source: PubMed Central journal article supplement (PMC3898387; doi:10.1186/1750-1326-9-5), 2014-01-09
Supplement: 1750-1326-9-5-S1.pdf [file 1750-1326-9-5-S1.pdf]

**Additional file 1:****Primers used for constructs generation**

| Template                    | Primers Sequence                                                                                                                                                                                                                                       | Product                                                          |
|-----------------------------|--------------------------------------------------------------------------------------------------------------------------------------------------------------------------------------------------------------------------------------------------------|------------------------------------------------------------------|
| pOT Nec<br>(GH10112)        | Forw: <b>Br_F1b</b> : 5'-ATA CGA ATT CAT GGC GAG CAA AG-3'<br>Rev: <b>Br_R4</b> : 5'-CAA TTG CTG GCT TCC TGG GCG AAG GTC TG-3.<br>His Rev: <b>Br_R1</b> : 5'-TCG TGG TGG TGG TGA TGA TGC TGG GCG AAG GTC-3'.                                           | <b>NEC</b><br><b>NEC-HIS</b>                                     |
| BRI2<br>mutant<br>templates | Forw: <b>Br_F3</b> : 5'-CAG ACC TTC GCC CAG GAA GCC AGC AAT TG-3'.<br>His Forw: <b>Br_F2</b> : 5'-CAT CAT CAC CAC CAC CAC GAA GCC AGC AAT TGT-3'.<br>Rev: <b>Br_R2</b> : 5'-GAT TCT CGA GTC AAG AAC AAA TTA AAG-3'.                                    | <b>BRI<sub>2</sub>-23</b><br><b>HIS- BRI<sub>2</sub>-23</b>      |
| BRI2<br>mutant<br>templates | Forw: <b>Br_F3</b> : 5'-CAG ACC TTC GCC CAG GAA GCC AGC AAT TG-3'.<br>His Forw: <b>Br_F2</b> : 5'-CAT CAT CAC CAC CAC CAC GAA GCC AGC AAT TGT-3'.<br>Rev: <b>Br_R3</b> : 5'-GAT TCT CGA GTT AAT TTT CCT CAA TAA TG-3'                                  | <b>ABri</b><br><b>HIS-ABri</b>                                   |
| BRI2<br>mutant<br>templates | Forw: <b>Br_F3</b> : 5'-CAG ACC TTC GCC CAG GAA GCC AGC AAT TG-3'.<br>His Forw: <b>Br_F2</b> : 5'-CAT CAT CAC CAC CAC CAC GAA GCC AGC AAT TGT-3'.<br>Rev: <b>Br_R5</b> : GAT TCT CGA GTC AAT AAT GTT TTT CTT GAC TGT-3'                                | <b>ADan</b><br><b>HIS-ADan</b>                                   |
| pGEX<br>APP-CT99            | Forw: <b>F-A<math>\beta</math>42</b> : 5'-CAG-ACC-TTC-GCC-CAG-GAT-GCA-G -3'<br>His Forw: <b>F-HIS A<math>\beta</math>42</b> : 5'-CAT-CAT-CAC-CAC-CAC-CAC-GAT-G -3'<br>Rev: <b>R-A<math>\beta</math>42</b> : 5'- GAT TCT CGA GTC ACG CTA TGA CAA CAC-3' | <b>A<math>\beta</math>42</b><br><b>HIS-A<math>\beta</math>42</b> |

The signal peptide cDNA from the *Drosophila* necrotic protein (Nec) was obtained from the pOT Nec (GH10112) by PCR using the following primers: forward Br\_F1b and reverse: Br\_R4. To generate the NEC-His construct we used forward Br\_F1b and reverse: Br\_R1.

The BRI<sub>2</sub>-23, ABri and ADan cDNAs were obtained by PCR from BRI2 templates using the following primers: for BRI<sub>2</sub>-23, ABri and ADan, forward: Br\_F3 and reverse Br\_R2, Br\_R3 and Br\_R5 respectively. (see Table) For His-tag constructs, forward, Br\_F2 and reverse Br\_R2, Br\_R3 and Br\_R5 respectively. The A $\beta$ 42 cDNAs was amplified from human APP-CT99 fragment cloned in pGEX using primer forward F\_A $\beta$ 42 and reverse R\_A $\beta$ 42, and for the His-tag version forward: F\_HIS-A $\beta$ 42 and reverse R\_A $\beta$ 42.

To get the Nec-peptide or Nec- His-peptide construct a nested PCR was performed mixing the PCR products from the previous reactions:

| 1st PCR products                    | Primers used                                                | Final Construct               |
|-------------------------------------|-------------------------------------------------------------|-------------------------------|
| NEC + BRI <sub>2</sub> -23          | Forw: <b>Br_F1b</b> and rev: <b>Br_R2</b>                   | NEC- BRI <sub>2</sub> -23     |
| NEC-HIS + HIS- BRI <sub>2</sub> -23 | Forw: <b>Br_F1b</b> and rev: <b>Br_R2</b>                   | NEC-HIS- BRI <sub>2</sub> -23 |
| NEC + ABri                          | Forw: <b>Br_F1b</b> and rev <b>Br_R3</b>                    | NEC-ABri                      |
| NEC-HIS +HIS- ABri                  | Forw: <b>Br_F1b</b> and rev: <b>Br_R3</b>                   | NEC-HIS- ABri                 |
| NEC + ADan                          | Forw: <b>Br_F1b</b> and rev: <b>Br_R5</b>                   | NEC-ADan                      |
| NEC-HIS + HIS-ADan                  | Forw: <b>Br_F1b</b> and rev: <b>Br_R5</b>                   | NEC-HIS-ADan                  |
| NEC + A $\beta$ 42.                 | Forw: <b>Br_F1b</b> and rev: <b>R-A<math>\beta</math>42</b> | NEC-A $\beta$ 42.             |
| NEC-HIS + HIS-A $\beta$ 42.         | Forw: <b>Br_F1b</b> and rev: <b>R-A<math>\beta</math>42</b> | NEC-HIS-A $\beta$ 42.         |

This second PCR product was cloned in the pUAST-attb.
