# Supplementary material for: Amyloid peptides ABri and ADan show differential neurotoxicity in transgenic Drosophila models of familial British and Danish dementia
Source: PubMed Central journal article supplement (PMC3898387; doi:10.1186/1750-1326-9-5), 2014-01-09
Supplement: 1750-1326-9-5-S4.pdf [file 1750-1326-9-5-S4.pdf]

Additional file 4

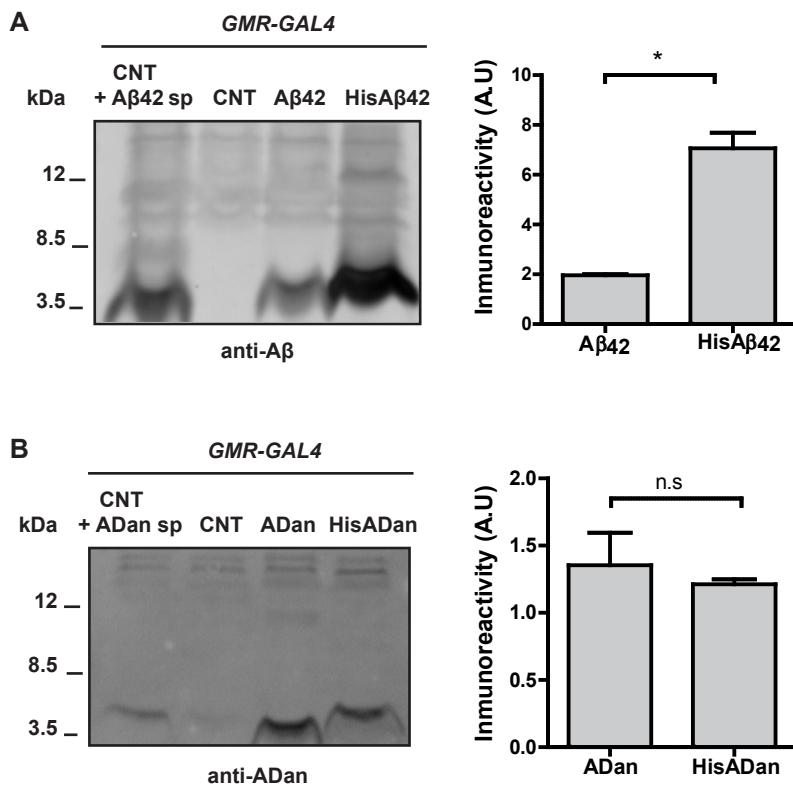

**Supp. Figure 3. Accumulation of untagged and His-tagged amyloid peptides.** **A**, Western blot with anti-A $\beta$  from fly heads expressing two copies of A $\beta$ 42 or HisA $\beta$ 42 as compared to non-transgenic flies. **B**, Western blot with anti-ADan from fly heads expressing two copies of ADan or HisADan compared to non-transgenic flies. On the right of each panel, quantification of immunoreactive bands. Bars represent the mean  $\pm$  SEM of three experiments. Asterisk indicates a statistically significant difference ( $*p < 0.05$ , Student's t-test)
